# Supplementary material
Source: PubMed Central journal article supplement (PMC4000425)

**Analytical and Bioanalytical Chemistry**

**Electronic Supplementary Material**

**Microchip electrophoresis with amperometric detection for the study of the generation of nitric oxide by NONOate salts**

Dulan B. Gunasekara, Matthew K. Hulvey, Susan M. Lunte, José Alberto Fracassi da Silva

**Figure S1:** Comparison of the nitrite migration time with a 100  $\mu\text{M}$  standard nitrite solution. The migration time for nitrite matches the obtained for the standard. A 100 micromolar hydrogen peroxide standard was included in the nitrite standard solution. We have determined that at pH 11, hydrogen peroxide is ionized and consequently migrates faster than the EOF. We can conclude that the NO peak moving with EOF will exhibit a migration time later than that of hydrogen peroxide, which agrees with the present data.

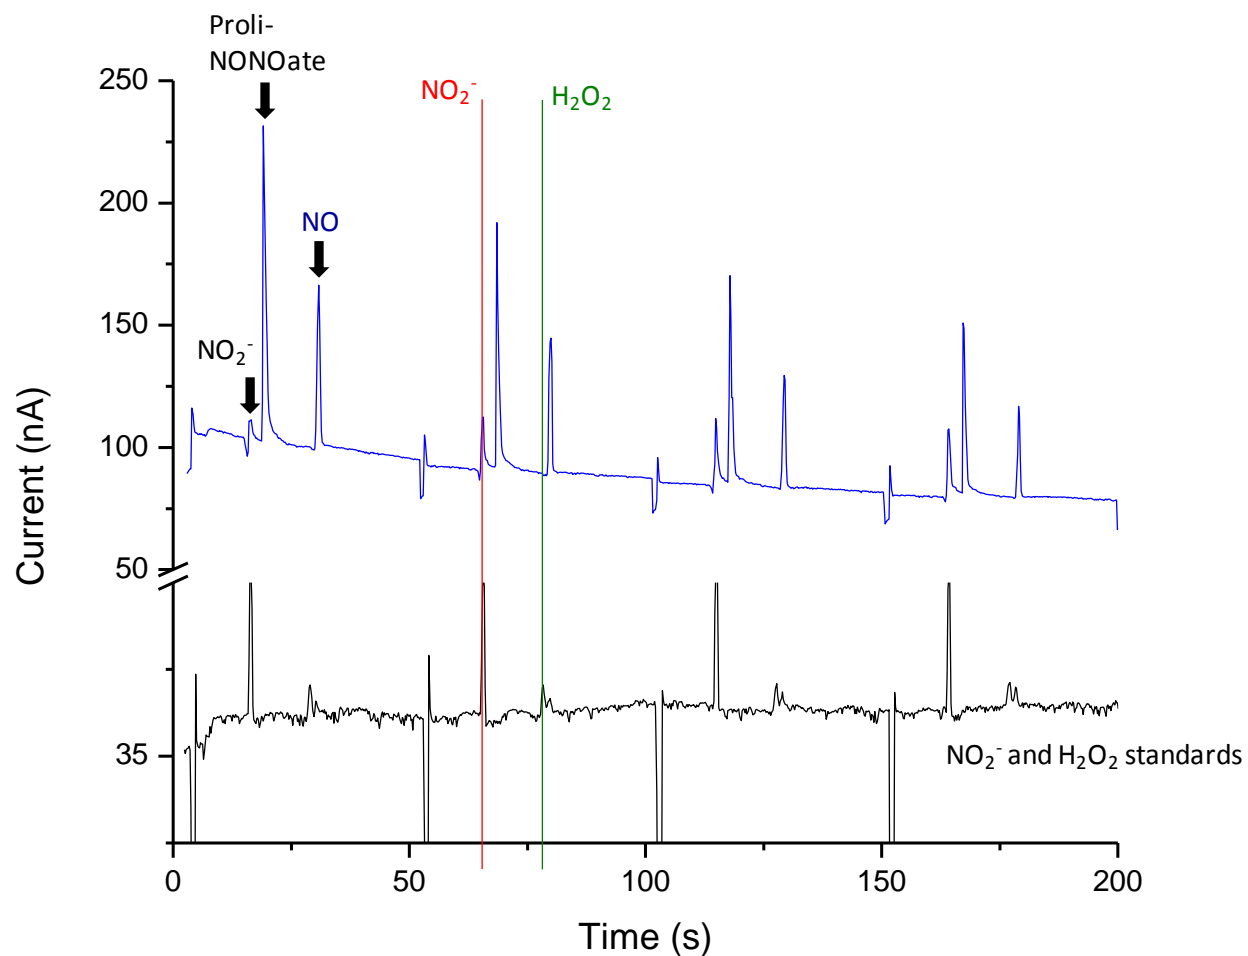

Supplement: NIHMS491003-supplement-supp__data.pdf [file NIHMS491003-supplement-supp__data.pdf]
